# Supplementary material for: Microglia regulate adult neurogenesis via interleukin-6 trans-signaling triggered by apoptotic progenitors
Source: Research Square preprint supplement (doi:10.21203/rs.3.rs-9619714/v1), 2026-06-04
Supplement: Supplementary file 1 [file 652196da87824aa75e32538c.docx]

**
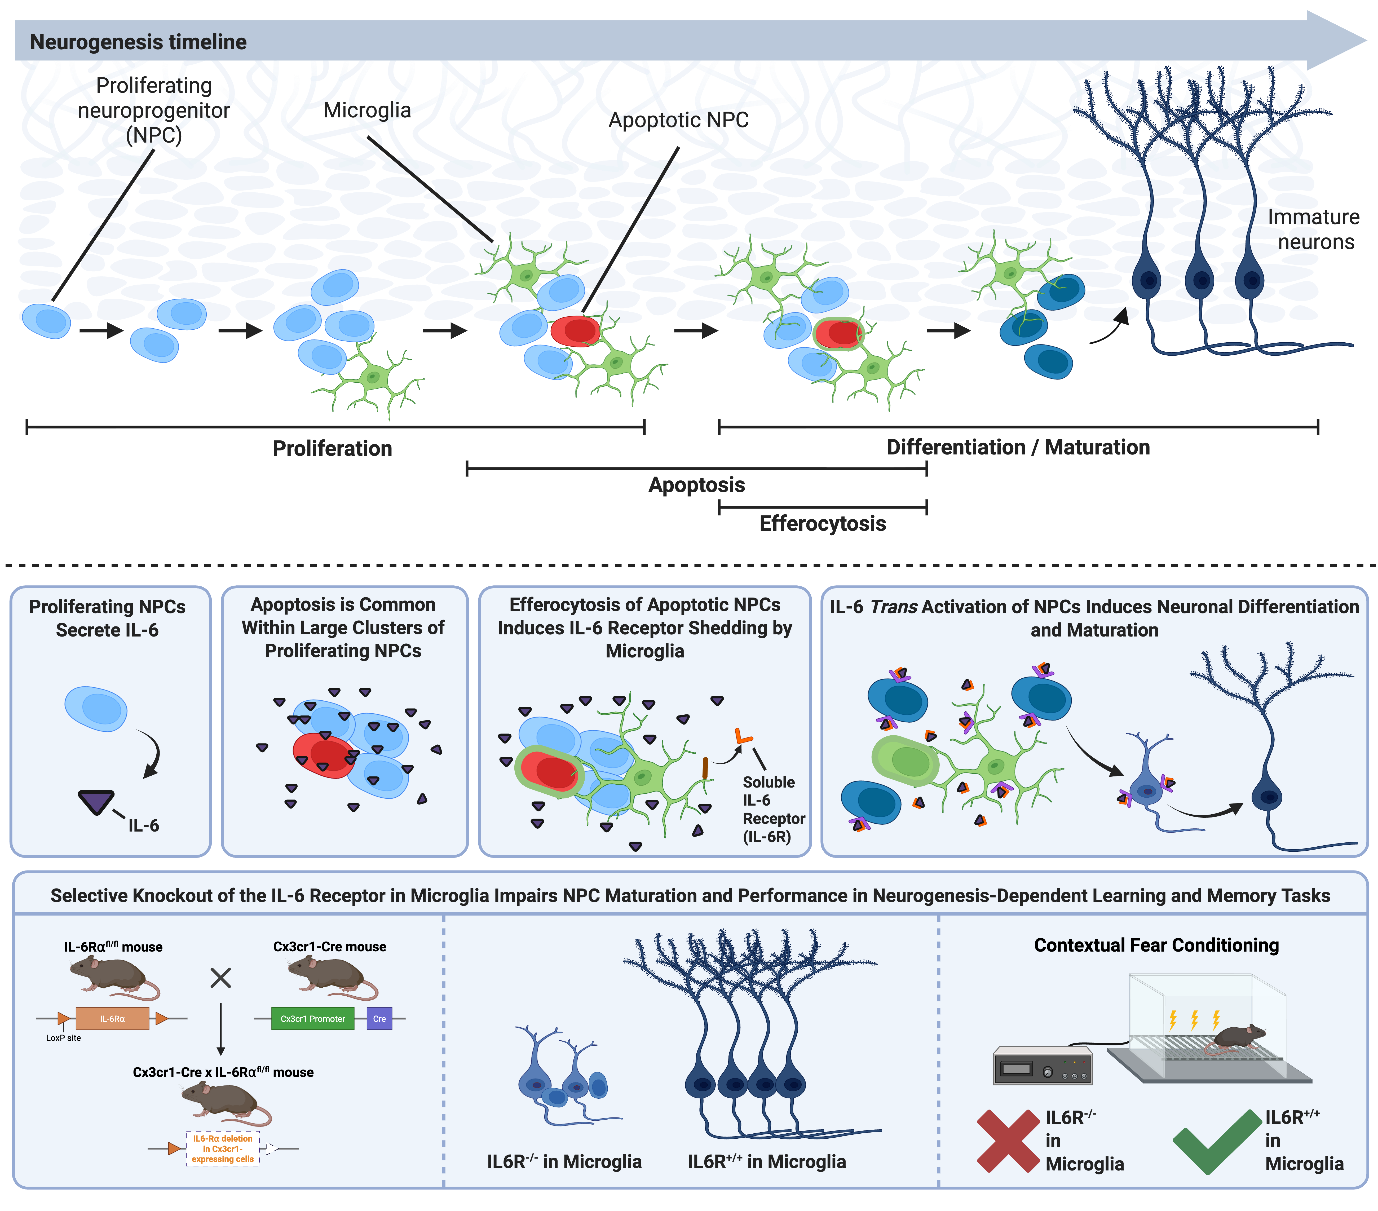
**

**Graphical abstract:** Recent advances have identified microglia and IL-6 as regulators of AHN. However, the mechanisms underlying this regulation remain unclear. Here,we demonstrate that proliferating NPCs secrete IL-6 and that apoptosis is common within clusters of proliferating NPCs. Next, we show that the efferocytosis of apoptotic NPCs induces IL-6R shedding by microglia and that IL-6 *trans* activation of NSCs induces neuronal differentiation and maturation. Finally, we generated conditional knockout mice that lack IL-6R expression exclusively in microglia and detected disturbed neurogenesis and cognitive deficits in a hippocampal neurogenesis-dependent learning and memory task. Thus, we posit that microglial efferocytosis in the SGZ induces IL-6R shedding, which initiates the transition from proliferation to differentiation and maturation in proximal healthy adult NPCs.
