# Supplementary material for: Microglia regulate adult neurogenesis via interleukin-6 trans-signaling triggered by apoptotic progenitors
Source: Research Square preprint supplement (doi:10.21203/rs.3.rs-9619714/v1), 2026-06-04
Supplement: Supplementary file 2 [file b09bc8d8f7cc7507a15316c3.docx]

Supplementary Materials for:

Microglia regulate adult neurogenesis via interleukin-6 *trans*-signaling triggered by apoptotic progenitors

**The PDF file includes:**

Figs. S1 to S5

Tables 1 to 4


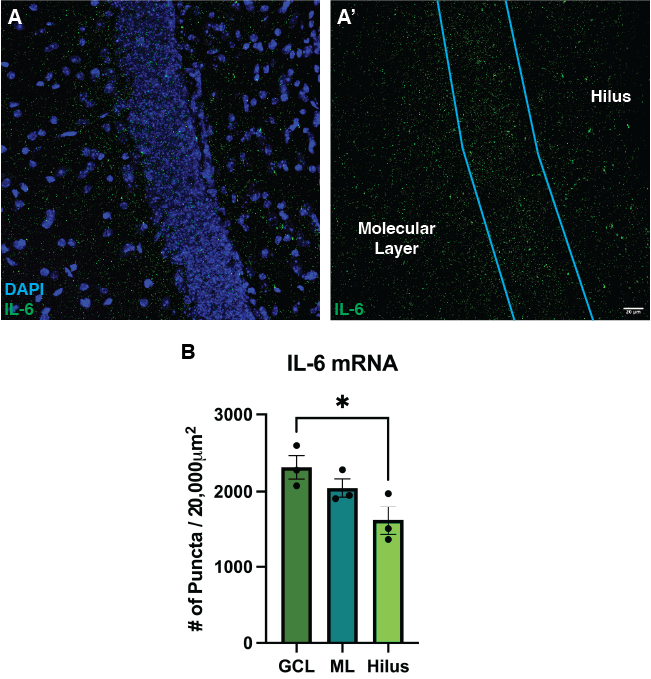


Fig. S1. IL-6 is expressed at significantly higher levels in the GCL than in the hilus (A-B). Representative images of IL-6 mRNA labeled via RNAscope from a young adult mouse (A-A’). Quantification of IL-6 puncta (B).


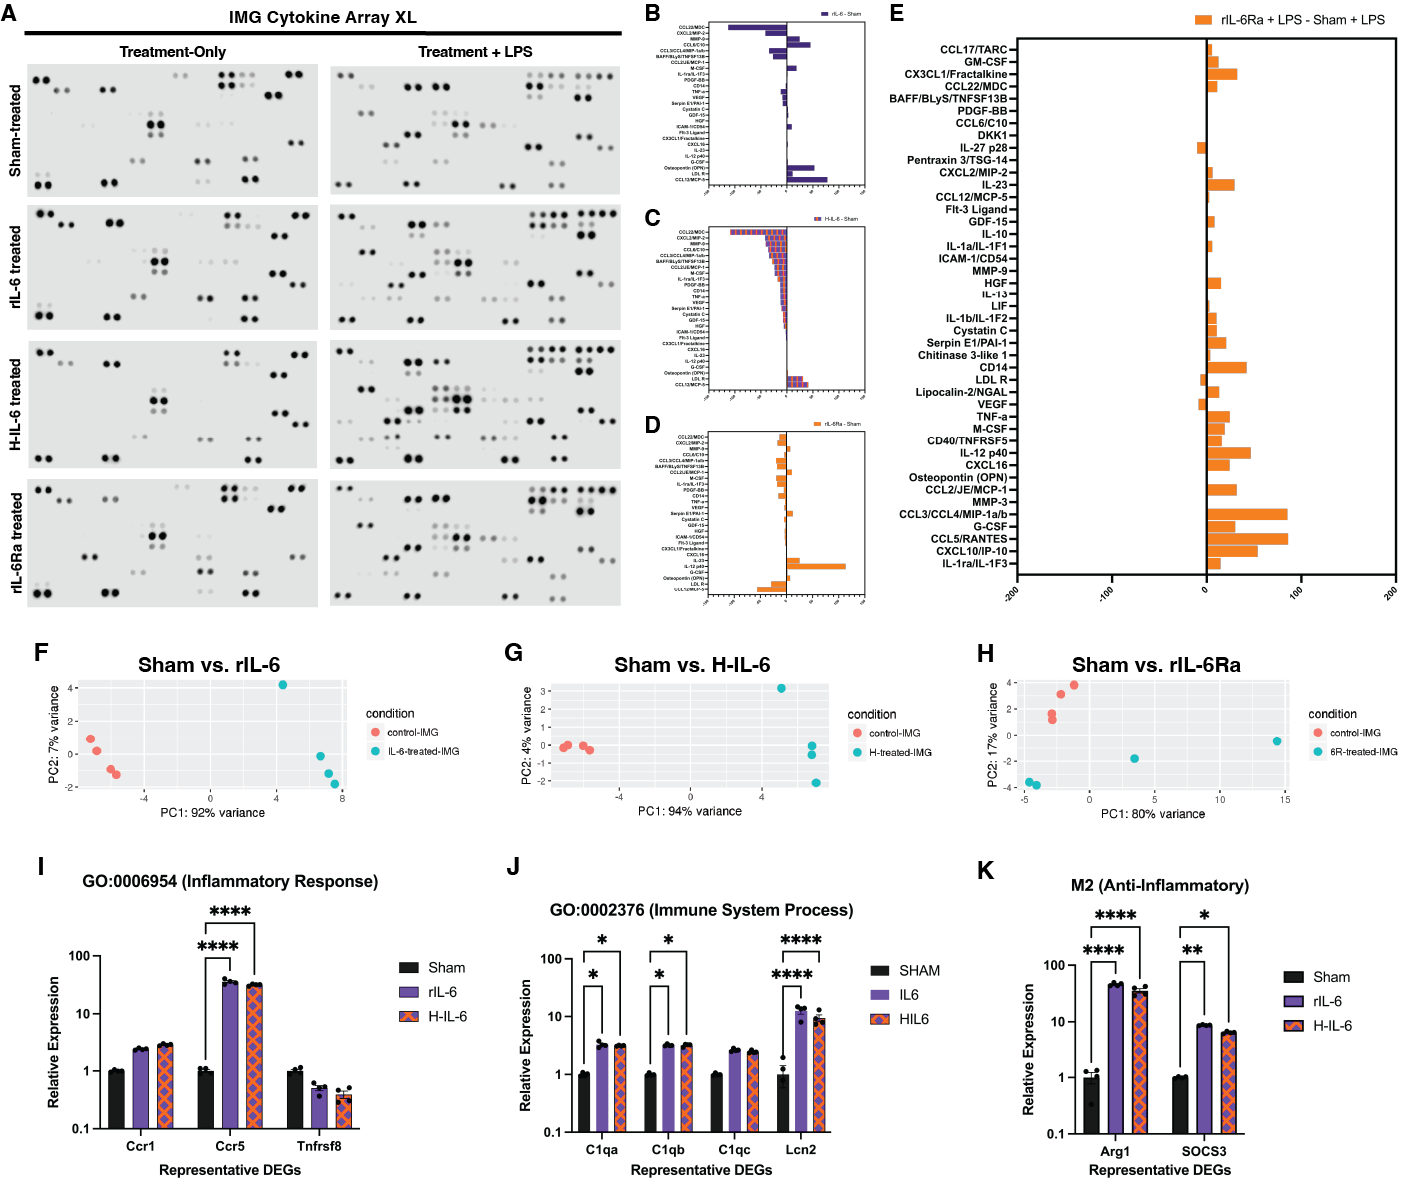


**Fig. S2.** Images showing the membranes from the experiments using the cytokine array XL (A). Graphs showing changes in the secretory profile of IMG treated with rIL-6R vs sham (B) H-IL-6 vs sham (C) and rIL-6Ra vs sham (D) and rIL-6Ra + LPS vs sham and LPS (E). Principle components analysis demonstrates changes in transcription vs control (F-H). Assessments of representative genes from activated GO pathways show that rIL-6 and H-IL-6 lead to identical changes in gene expression in both direction and magnitude (I-K).


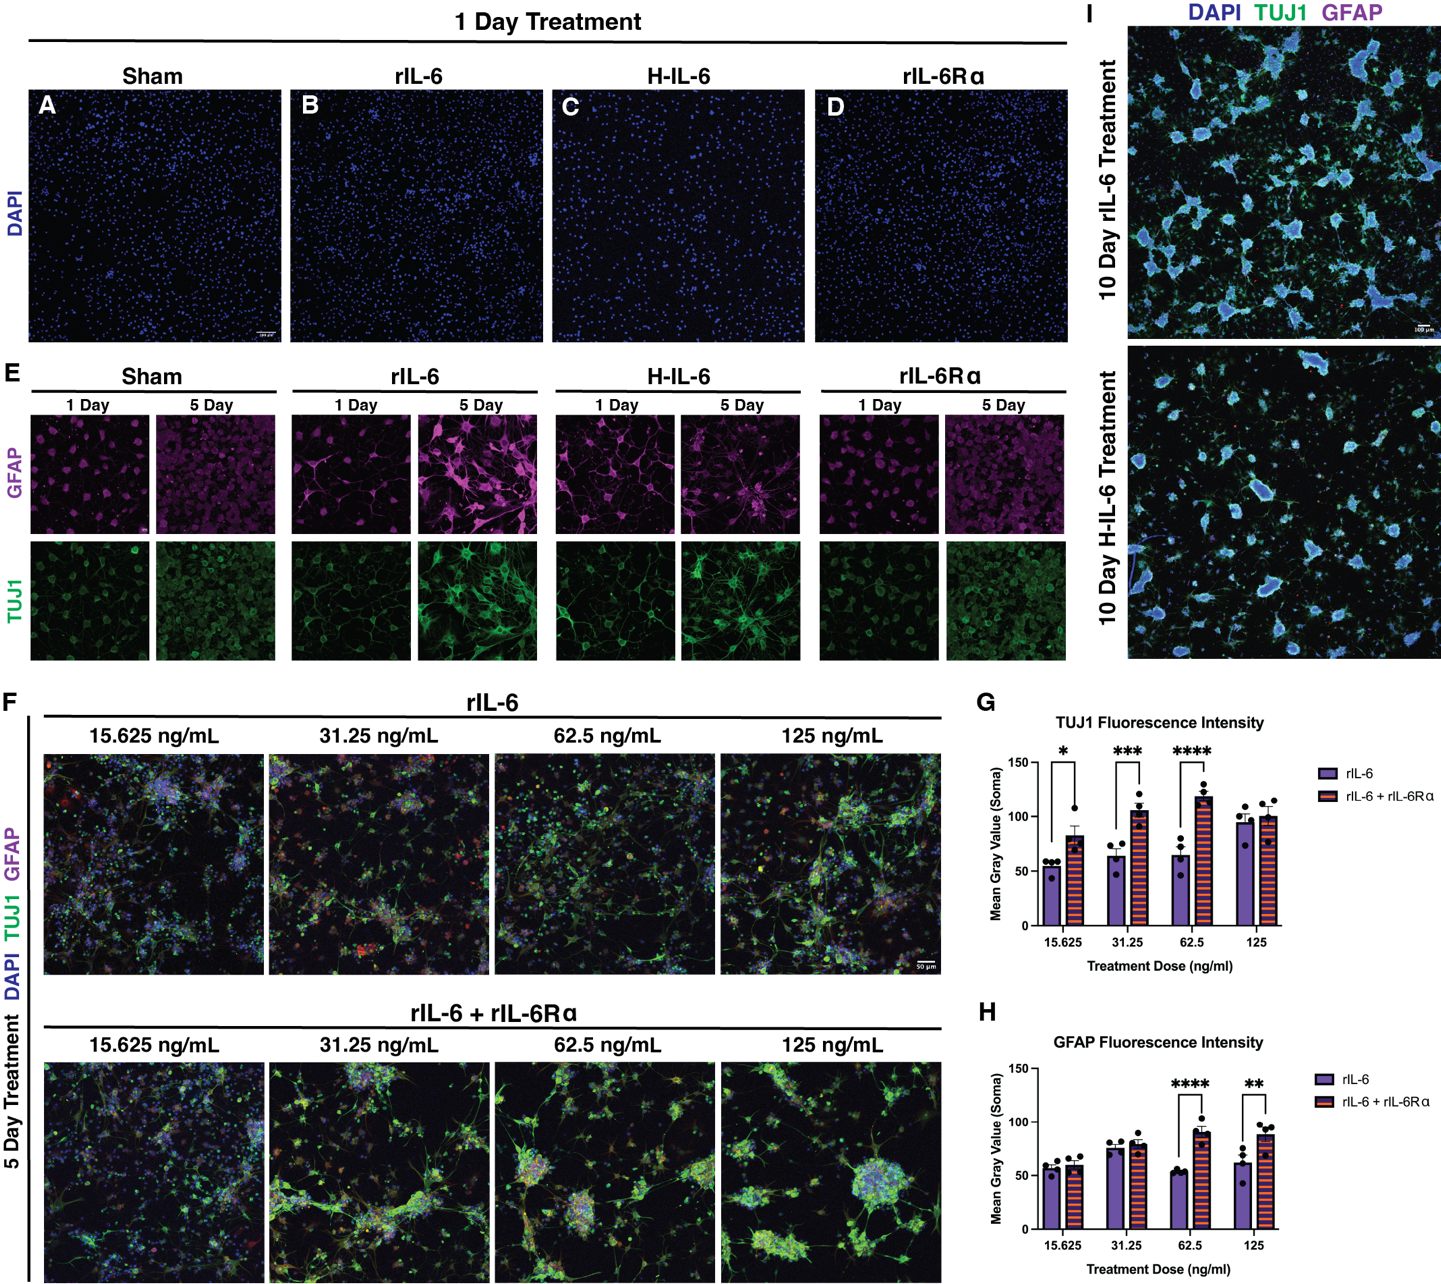


**Fig. S3.** Representative images from RAH-NSC proliferation assays (A-D) and individual channels for fluorescence intensity analysis (E). Assays of titrations of treatments reveal that rIL-6Ra boosts the potency of rIL-6 (F-H). Representative images of RAH-NSC clusters after 10-day treatments (I).


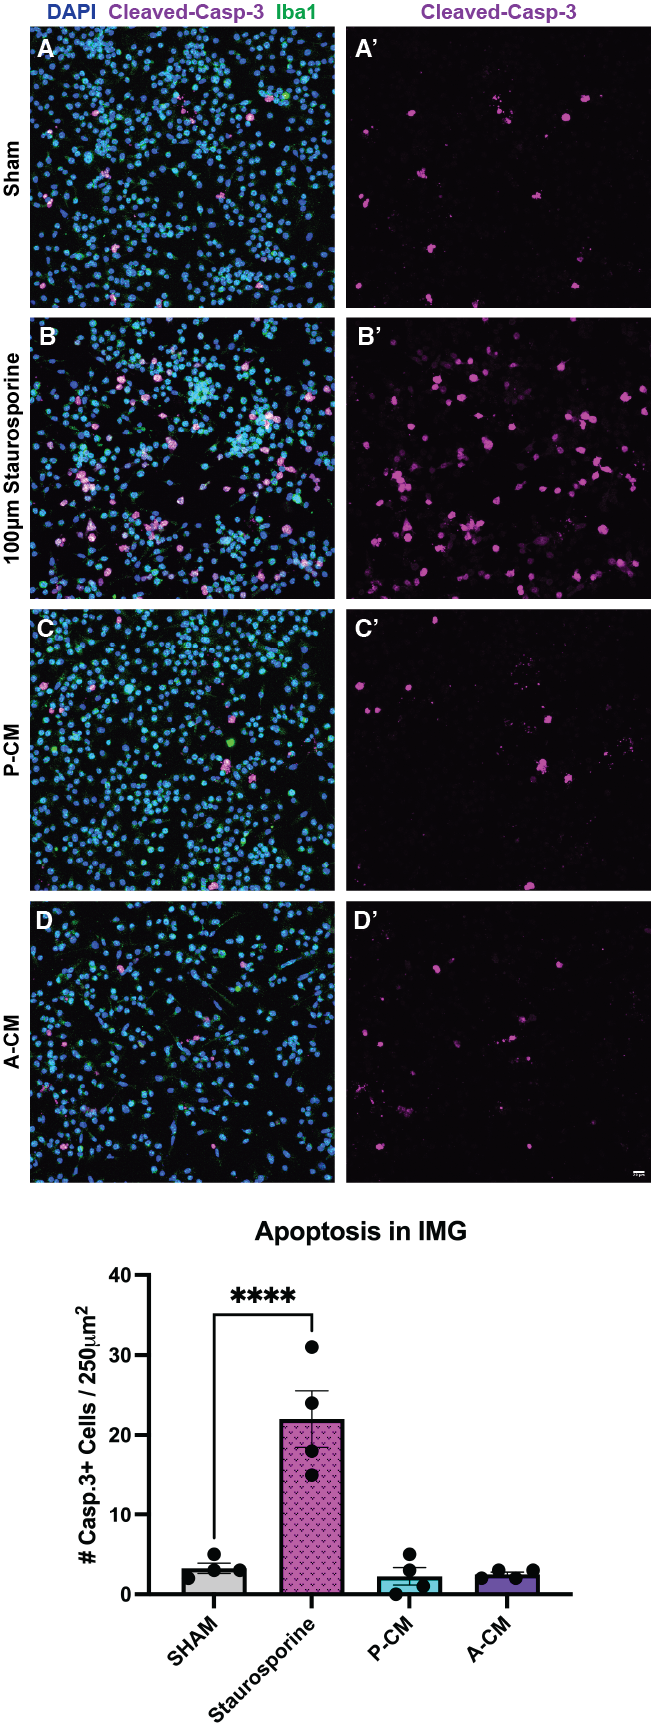


**Fig. S4.** P-CM and A-CM do not cause apoptosis in IMG microglia (A-D’).


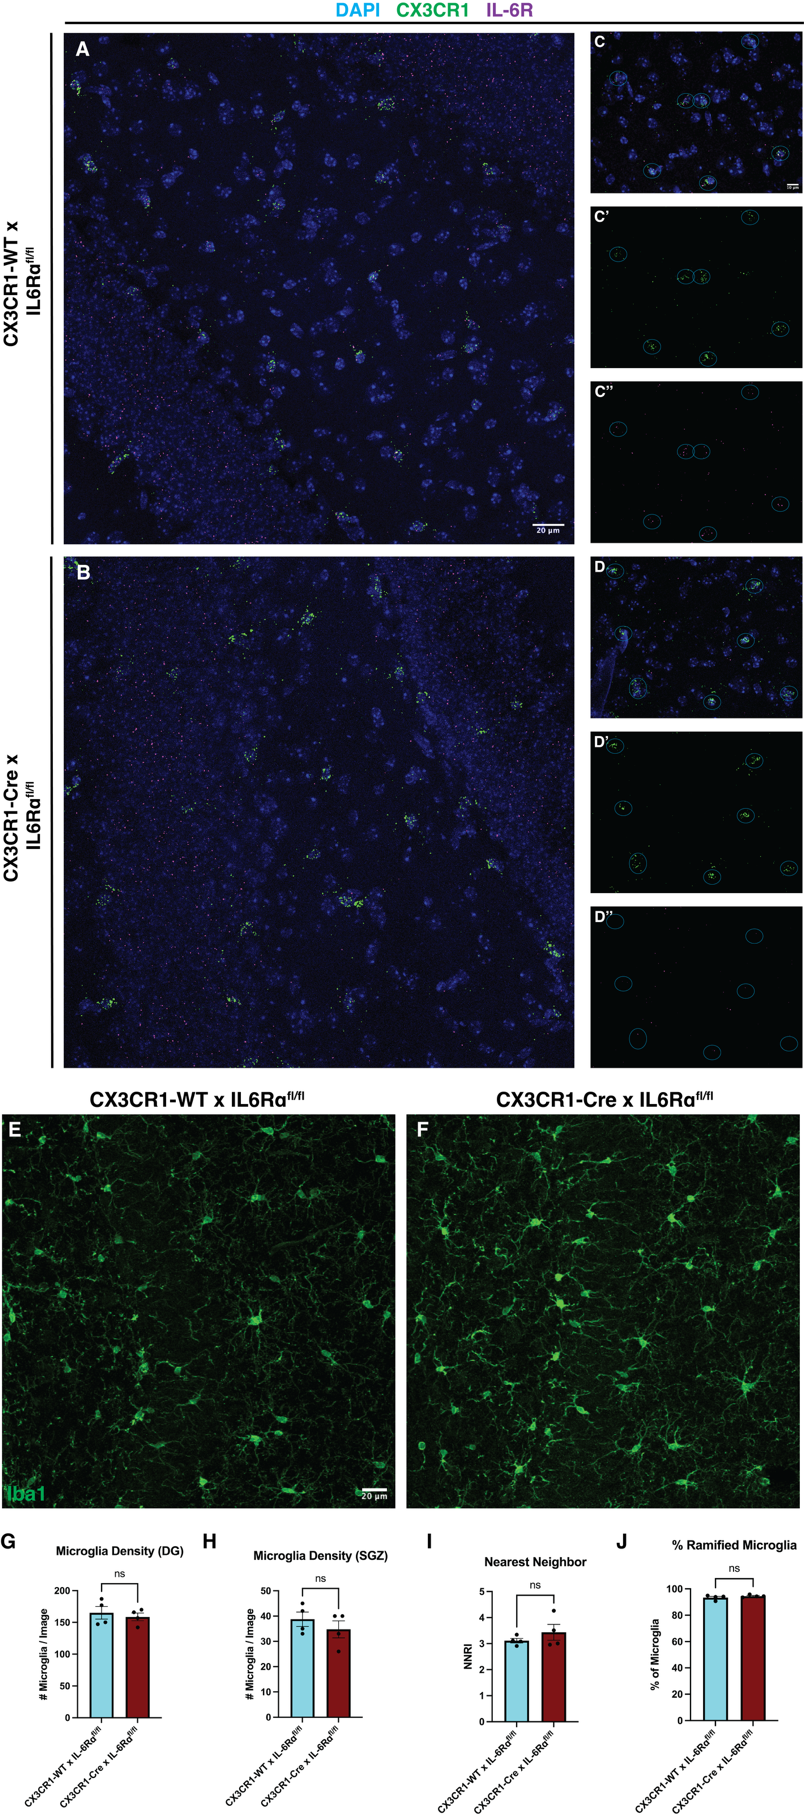


**Fig. S5.** Representative images of RNAscope-labeled microglia and IL-6R in the hippocampus of control or double-transgenic mice (A-D’’). Immunolabeling for iba1 (E-F) and analyses of microglia density (G-H), tiling regularity (I), and activation state (J) reveal that microglia from both groups are unchanged in many ways.

**Supplementary Table 1.**

| **Supplementary Figure 2I-K Data** | | | | | |
| --- | --- | --- | --- | --- | --- |
|  | **Sham** | **rIL-6** | **H-IL-6** | **Sham vs. rIL-6** | **Sham vs. H-IL-6** |
| **CCR1** | *1.00 +/-0.04* | *2.377 +/-0.10* | *2.826 +/-0.11* | *P=.21* | *P=.08* |
| **CCR5** | *1.00 +/-0.12* | *35.76 +/-3.52* | *31.54 +/-1.13* | *P<.0001* | *P<.0001* |
| **Tnfrsf8** | *1.00 +/-0.12* | *0.50 +/-0.10* | *0.39 +/-0.11* | *P=.79* | *P=.71* |
| **C1qa** | *1.00 +/-0.07* | *3.27 +/-0.37* | *3.13 +/-0.06* | *P=.01* | *P=.02* |
| **C1qb** | *1.00 +/-0.05* | *3.20 +/-0.13* | *3.19 +/-0.17* | *P=.02* | *P=.02* |
| **C1qc** | *1.00 +/-0.05* | *2.64 +/-0.15* | *2.46 +/-0.13* | *P=.10* | *P=.15* |
| **Lcn2** | *1.00 +/-0.83* | *12.57 +/-3.08* | *9.39 +/-2.55* | *P<.0001* | *P<.0001* |
| **Arg1** | *1.00 +/-0.46* | *45.88 +/-2.99* | *35.39 +/-6.47* | *P<.0001* | *P<.0001* |
| **Socs3** | *1.00 +/-0.04* | *8.70 +/-0.20* | *6.45 +/-0.27* | *P=.002* | *P=.03* |

**Supplementary Table 2.**

| **Figure 3P-Q Data** | | |
| --- | --- | --- |
|  | **TUJ1** | **GFAP** |
| **Sham 1 Day** | *65.57 +/-0.74* | *28.29 +/-2.01* |
| **Sham 5 Day** | *69.72 +/-6.24* | *29.00 +/-0.87* |
| **rIL-6 1 Day** | *80.57 +/-4.25* | *30.71 +/-0.97* |
| **rIL-6 5 Day** | *132.02 +/-11.68* | *49.44 +/-6.82* |
| **H-IL-6 1 Day** | *93.65 +/-6.91* | *43.67 +/-1.83* |
| **H-IL-6 5 Day** | *132.20 +/-11.65* | *43.33 +/-6.95* |
| **rIL-6R*⍺* 1 Day** | *75.49 +/-6.37* | *29.07 +/-1.73* |
| **rIL-6R*⍺* 5 Day** | *67.27 +/-7.61* | *28.09 +/-2.71* |

**Supplementary Table 3.**

| **Supplementary Figure 3G Data** | | | |
| --- | --- | --- | --- |
| *TUJ1* | **rIL-6** | **rIL-6 + rIL-6Ra** | **rIL-6 vs. rIL-6 + rIL-6Ra** |
| **15.625 ng/ml** | 54.77 +/- 7.52 | *82.86 +/- 17.00* | *P=.03* |
| **31.25 ng/ml** | *64.00 +/- 13.10* | *105.79 +/- 12.70* | *P=.001* |
| **62.5 ng/ml** | *64.77 +/- 14.72* | *119.04 +/- 9.02* | *P<.0001* |
| **125 ng/ml** | *94.78 +/- 15.12* | *100.52 +/- 17.33* | *P=.96* |

**Supplementary Table 4.**

| **Supplementary Figure 3H Data** | | | |
| --- | --- | --- | --- |
| *GFAP* | **rIL-6** | **rIL-6 + rIL-6Ra** | **rIL-6 vs. rIL-6 + rIL-6Ra** |
| **15.625 ng/ml** | *56.83 +/- 6.10* | *59.89 +/- 7.97* | *P=.98* |
| **31.25 ng/ml** | *75.74 +/- 6.29* | *79.27 +/- 8.19* | *P=.97* |
| **62.5 ng/ml** | *53.60 +/- 1.76* | *90.54 +/- 10.28* | *P<.0001* |
| **125 ng/ml** | *62.03 +/- 14.12* | *88.43 +/- 13.38* | *P=.002* |
